# Supplementary material for: High-speed scanning of planar images showing 123I-MIBG uptake using a whole-body CZT camera: a phantom and clinical study
Source: Springer Nature journal article supplement (doi:10.1186/s13550-019-0491-z), 2019-02-26

# Figure S1: Details of Phantom models

**A**

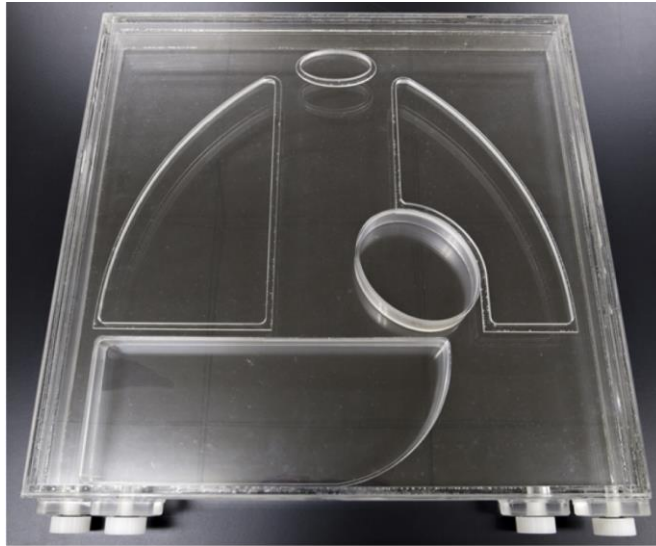

**B: Schema of organ model**

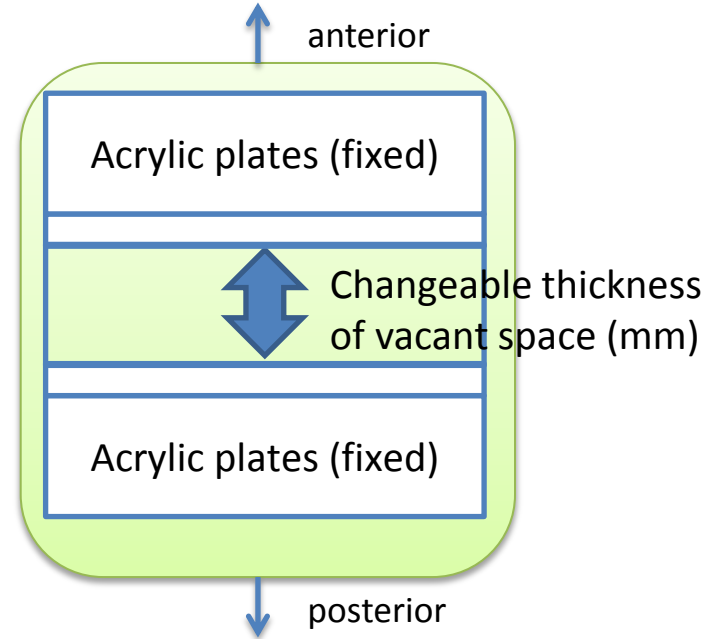

**C**

| Model type    | Vacant space thickness (mm) |             |      |       |
|---------------|-----------------------------|-------------|------|-------|
|               | heart                       | mediastinum | Lung | Liver |
| Normal model  | 30                          | 10          | 15   | 30    |
| Disease model | 25                          | 15          | 20   | 30    |

# Figure S2: Correlation between reference HMRs and difference of HMRs (300s – other collection time)

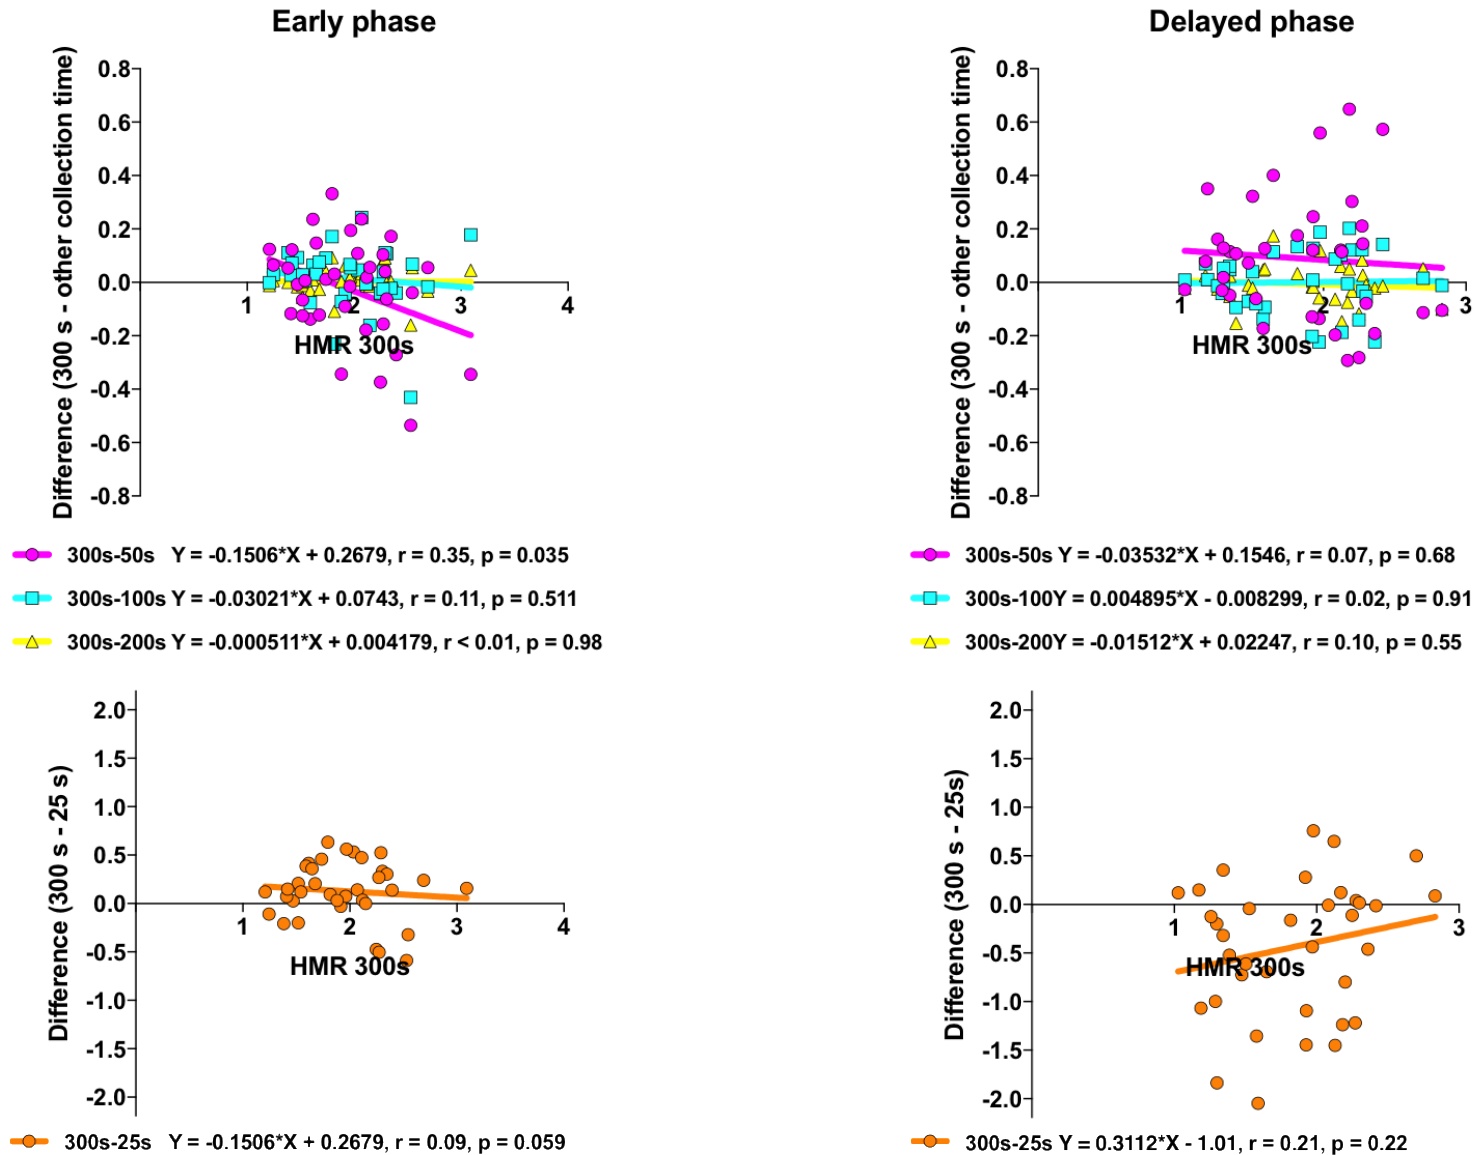

Supplement: MOESM1 [file 16510140]
